# Supplementary material
Source: MDPI journal article supplement (https://www.mdpi.com/2311-7524/10/1/84)
Supplement: s1 [file s1]

**Table S1. Primers used in RT-PCR analysis and vector construction**

| PRIMERS                                                    | SEQUENCE                                        |
|------------------------------------------------------------|-------------------------------------------------|
| <b>For qRT-PCR</b>                                         |                                                 |
| <i>RhMED15a</i> -RT-Up                                     | ACCCACTGTTGTGCCGTGAT                            |
| <i>RhMED15a</i> -RT-Dn                                     | ACCGTAATAAGCAAATCGAAAGC                         |
| <i>RhMED26B</i> -RT-Up                                     | TTCCGGGATTTGAATTTGATTG                          |
| <i>RhMED26B</i> -RT-Dn                                     | CAGACTTGCCCGTGGTCG                              |
| <i>RhDREB1B</i> -RT-Up                                     | CAAGGAGACGAGGCACCCGGTGTACCG                     |
| <i>RhDREB1B</i> -RT-Dn                                     | ATGCAATCCGTACTTCTCAAAGAAGTTAT                   |
| <i>RhUBI2</i> -RT-Up                                       | GCCCTGGTGCGTTCCCAACTG                           |
| <i>RhUBI2</i> -RT-Dn                                       | CCTGCGTGTCTGTCCGCATTG                           |
| <b>For the promoter cloning</b>                            |                                                 |
| <i>RhMED15A</i> -CDS-Up                                    | AAAACCGACTTGATTCTTACGC                          |
| <i>RhMED15A</i> -CDS-Dn                                    | AGACAGACGGACCGAGCAG                             |
| <i>RhMED26B</i> -CDS-Up                                    | TTGTTCTCCGGTGAAGTTTG                            |
| <i>RhMED26B</i> -CDS-Dn                                    | ACTACAGGATGGTCTTTGCATTT                         |
| <b>For vector construction of subcellular localization</b> |                                                 |
| pCambia2300-GFP- <i>RhMED15a</i> -Up                       | tacaagggtaccggggatccATGGACACGAATAATTGGAGGC      |
| pCambia2300-GFP- <i>RhMED15a</i> -Dn                       | cttgcattgcctgcaggtcgacTCAAGCGGCACTCAGGCA        |
| PCambia2300-Up                                             | CCACCCACGAGGAGCA                                |
| PCambia2300-Dn                                             | TGTGGAATTGTGAGCGGAT                             |
| <b>For vector construction of VIGS</b>                     |                                                 |
| pTRV2- <i>RhMED15a</i> -Up                                 | gtgagtaagggtaccgaattcTTGGTACTCAAAGTGGTAACTCAAGC |
| pTRV2- <i>RhMED15a</i> -Dn                                 | cgtgagctcgggtaccggatccCGTTGATGACGTCTCAGGAAGG    |
| pTRV2-Up                                                   | TGGGAGATGATACGCTGTT                             |
| pTRV2-Dn                                                   | CCTAAAGTTCAGACACGGAT                            |
| pTRV1-Up                                                   | TTACAGGTTATTTGGGCTAG                            |
| pTRV1-Dn                                                   | CCGGGTTCAATTCCTTATC                             |
