# Supplementary material
Source: MDPI journal article supplement (https://www.mdpi.com/2311-7524/10/1/84)
Supplement: s1 [file s1]

Archive with 2 entries (2 files):
- 23-12-19 RhMED15a supplemental figures.pdf
- 23-12-19 RhMED15a supplemental table.pdf
